# Supplementary material
Source: PubMed Central journal article supplement (PMC3643396)
Supplement: supp_13-11642_IOVS-13-11642-s03.pdf [file supp_13-11642_IOVS-13-11642-s03.pdf]

**Supplementary Movie S1:** Animation of multiple cross-section images collected perpendicular to the surface of the mouse eye. Animation begins at the surface and proceeds toward the photoreceptor cell layer, encompassing a total of 51  $\mu\text{m}$ . The animation contains a total of 51 cross-sections spaced 1  $\mu\text{m}$  apart. Signal from the forward coherent anti-Stokes Raman scattering detector (F-CARS, red), epi-detector (E-CARS, green) and two-photon autofluorescence (TPAF, blue) are shown.

**Supplementary Movie S2:** 3D rendering of S1.
